# Supplementary material for: In Planta Processing of the SpCas9–gRNA Complex
Source: PubMed Central journal article supplement — Plant Cell Physiol. 2017 Oct 12;58(11):1857–67. doi: 10.1093/pcp/pcx154 (PMC5921533; doi:10.1093/pcp/pcx154), 2017-10-12
Supplement: pcp-2017-e-00369-file009_pcx154.pdf [file pcp-2017-e-00369-file009_pcx154.pdf]

## Supplemental information

### *In planta* processing of the SpCas9/gRNA complex

Masafumi Mikami<sup>1,2</sup>, Seiichi Toki<sup>1,2,3</sup> Masaki Endo<sup>2\*</sup>

<sup>1</sup> Graduate School of Nanobioscience, Yokohama City University, 22-2 Seto, Yokohama, Kanagawa 236-0027, Japan.

<sup>2</sup> Plant Genome Engineering Research Unit, Institute of Agrobiological Sciences, National Agriculture and Food Research Organization, 2-1-2 Kannondai, Tsukuba, Ibaraki, 305-8602, Japan.

<sup>3</sup> Kihara Institute for Biological Research, Yokohama City University, 641-12 Maioka-cho, Yokohama, Kanagawa, 244-0813, Japan.

\*Corresponding author, E-mail, [mendo@affrc.go.jp](mailto:mendo@affrc.go.jp);

Tel, +81 29 838 8450; Fax, +81 29 838 8450

## Supplemental Figure Legends

### Figure S1.

#### Targeted mutagenesis using SpCas9-rz-gRNA or SpCas9-gRNA systems at different target loci in rice calli.

(A) Mutation variations on *DL* gene locus (gDL-1) in the SpCas9-rz-gRNA vector transformed callus line #4. The wild type sequence is shown at the top with the PAM sequence in green, and the 20-nt target sequence in red. The blue arrowhead indicates the expected cleavage site. Dashes: deleted bases. The net changes in length are shown to the right of each sequence (+, insertion; -, deletion). The number of clones representing each mutant allele is shown in brackets. (B) CAPS analysis of three genes in each of SpCas9-rz-gRNA vector transformed calli and SpCas9-gRNA vector transformed calli. Mutation frequency of calli shown by red was calculated from ratio of sequenced clones with mutation. -: Non-digested PCR products, +: *Pst* I-digested PCR products. Blue arrowhead indicated the position of undigested PCR products. An undigested band indicates mutations in the target loci.

### Figure S2.

#### Targeted mutagenesis using SpCas9-rz-gRNA or SpCas9-gRNA systems in *Arabidopsis*.

(A) Schematic representation of the constructs used in this study. The *SpCas9* gene was optimized for *Arabidopsis* codon usage, and controlled by ubiquitin 4-2 promoter from *Petroselinum crispum* (PcUbi; Fauser et al. 2012). (B) CAPS analysis of *BR11* gene in each of SpCas9-rz-gRNA vector transformed T1 plants and SpCas9-gRNA vector transformed T1 plants. Mutation frequency of calli shown by red was calculated from ratio of sequenced clones with mutation. -: Non-digested PCR products, +: *Pst* I-digested PCR products. Blue arrowhead indicated the position of undigested PCR products. An undigested band indicates mutations in the target loci. (C) Mutation variations on *BR11* gene locus in the SpCas9-rz-gRNA vector transformed T1 plant line #6. The wild type sequence is shown at the top with the PAM sequence in green, and the 20-nt target sequence in red. The blue arrowhead indicates the expected cleavage site. Dashes: deleted bases. The net changes in length are shown to the right of each sequence (+, insertion; -, deletion).

### Figure S3.

#### Schematics of expected gRNA sequences by northern blot analysis.

(A) Schematics of gRNA sequence driven by OsU6 (pol III) or 2x35S (pol II) promoters. (B) Schematics of gRNA sequence connected to *HPT* gene. (C) Schematics of sequence of SpCas9-rz-gRNA. Blue character: target sequence, red character: gRNA scaffold sequence, orange character: poly (T) sequence, green character: 35S terminator sequence, purple character: pea3A terminator sequence gray character: poly (A) addition signal sequence, pink character: hammerhead ribozyme sequence, 'G' italic character: predicted transcription start site, under lined character: *HPT* or *SpCas9* gene sequence .

## Supplemental Figure Legends

### Figure S4.

#### Northern blot analysis of gRNA expression by prolonged exposure.

This figure shown prolonged exposure of Fig. 3B.

### Figure S5.

#### Comparison of mutation frequency among three promoters using SpCas9-rz-gRNA vector in rice calli.

Mutation frequency of calli shown by red was calculated from ratio of sequenced clones with mutation. -: Non-digested PCR products, +: *Pst* I-digested PCR products. Blue arrowhead indicated the position of undigested PCR products. An undigested band indicates mutations in the target loci.

### Figure S6.

#### Structure of in-vitro-transcribed gRNAs

Schematic representation of the expected size (nt) of in-vitro-transcribed gRNAs in this study. \*: OsU6gRNA\_T7 was synthesized using Guide-it sgRNA *In Vitro* Transcription Kit (TAKARA).

### Figure S7.

#### Analysis of five in-vitro-transcribed gRNAs in a SpCas9 protein dependent manner.

(A) Northern blot analysis of five in-vitro-transcribed gRNAs in the presence or absence of the SpCas9 protein. Target gene was *DL* gene (gDL-1 locus). In-vitro-transcribed gRNAs No. 1: OsU6gRNA\_T7, No. 2: 2x35SgRNA\_T7, No. 3: SpCas9:fra-rz-gRNA, No. 4: SpCas9:fra-gRNA, No. 5: HPT-rz-gRNA\_T7. *h* band: gRNA processed by the hammerhead ribozyme sequence from SpCas9:fra-gRNA. *i* band: gRNA processed by the hammerhead ribozyme sequence from HPT-rz-gRNA. (B) Cleavage efficiency of target DNA using five in-vitro-transcribed gRNAs in a SpCas9 protein dependent manner. The reaction solutions did not add RNase A after in vitro cleavage reaction. Target gene was *DL* gene (gDL-1 locus). Arrowheads indicated the position of cleaved PCR products. Cleavage efficiency was determined by the formula,  $100 * (1 - \sqrt{1 - (b+c)/(a+b+c)})$ , where *a* is the integrated intensity of the PCR product digested only with gRNA, and *b* and *c* are the integrated intensities of each cleavage product.

## Supplemental Figure Legends

### Figure S8.

#### **SpCas9 protein- and RNases-mediated other target DNA cleavage in vitro.**

Cleavage of the linear target DNA of the gDL-2 locus in a SpCas9 protein- and RNase III- or RNase T1-dependent manners. Yellow arrowheads indicated the position of cleaved PCR products. Cleavage efficiency was determined by the formula,  $100 * (1 - \sqrt{1 - (b+c)/(a+b+c)})$ , where a is the integrated intensity of the PCR product digested only with gRNA, and b and c are the integrated intensities of each cleavage product. +\* means that the SpCas9 protein, RNase III or RNase T1 are added after 20 min of the in vitro cleavage reaction.

### Figure S9.

#### **Multiplex targeted mutagenesis with or without different positions of ribozyme sequence and gRNA in rice calli.**

(A) Schematic representation of the SpCas9-gRNAs vectors and CAPS analysis of each of DL-1 and DL-2 locus on *DL* gene. -: Non-digested PCR products, +: *Pst* I-digested PCR products. (B) Schematic representation of the 1145 bp region with two gRNA-targeted sites. F1, F2, R1 and R2: PCR primers. Blue arrowheads : target loci (gDL-1 and gDL-2 loci). (C) Deletion and sequence of 1145 bp induced by using each of SpCas9-gRNA vectors in rice calli. Blue arrowhead indicated the position of 1145 bp deleted PCR products. WT band: 1937 bp, expected deletion band: 792 bp. (D) Mutation variations of large deleted PCR products on *DL* gene locus in line #2. The wild type sequence is shown at the top with the PAM sequence in green, and the 20-nt target sequence in red. The blue arrowhead indicates the expected cleavage site. Dashes: deleted bases.

(A)

Target gene : *DL* (gDL-1 locus)  
SpCas9-rz-gRNA transformed callus : line #4

TTTTTCGTCTTTTGGGTAGCTGCAGGTGGAGTCCCATG WT (x0)  
TTTTTCGTCTTTTGGGTAGCTGC-GGTTGGAGTCCCATG -1 (x2)  
TTTTTCGTCTTTTGGGTAGC---AGGTTGGAGTCCCATG -3 (x2)  
TTTTTCGTCTTTTGGGTAGC----GGTTGGAGTCCCATG -4 (x1)  
TTTTTCGTCTTTTGGGTAG-----GAGTCCCATG -10 (x1)  
TTTTTCGTCTTTTGG-----TTGGAGTCCCATG -11 (x1)  
TTTTTCGTCTTTTGGGTAGCTGCA--ACAACCTCTC--- -22+10 (x1)  
TTTTTCGTCTTTTGGGTAGCTGCA<sup>C</sup>GGTTGGAGTCCCATG +1 (C) (x2)  
TTTTTCGTCTTTTGGGTAGCTGCA<sup>A</sup>GGTTGGAGTCCCATG +1 (A) (x11)  
TTTTTCGTCTTTTGGGTAGCTGCA<sup>T</sup>GGTTGGAGTCCCATG +1 (T) (x2)  
TTTTTCGTCTTTTGGGTAGCTGCA<sup>G</sup>GGTTGGAGTCCCATG +1 (G) (x1)

(B)

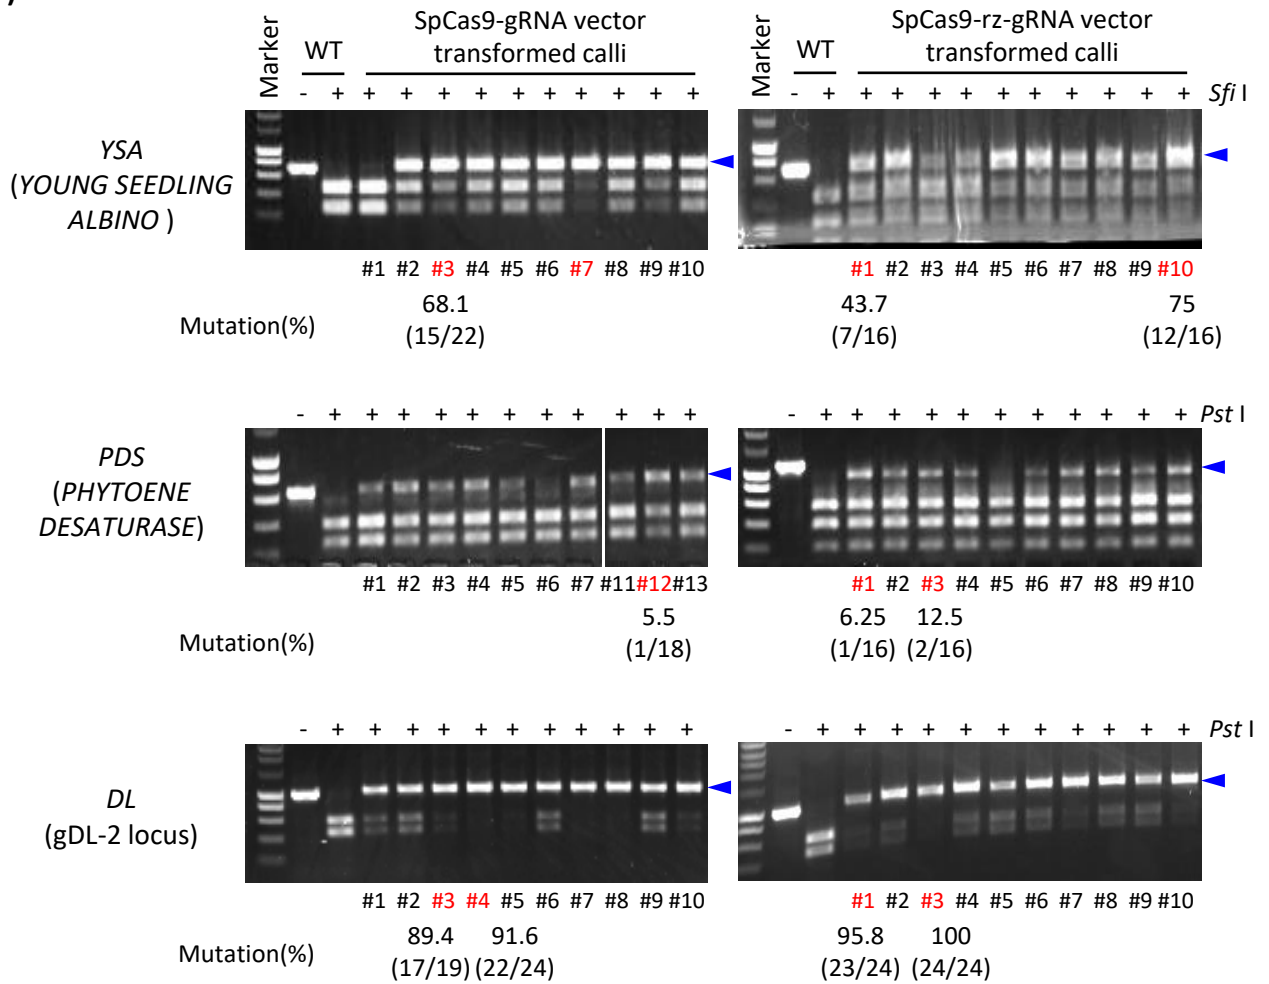

Figure. S1

(A)

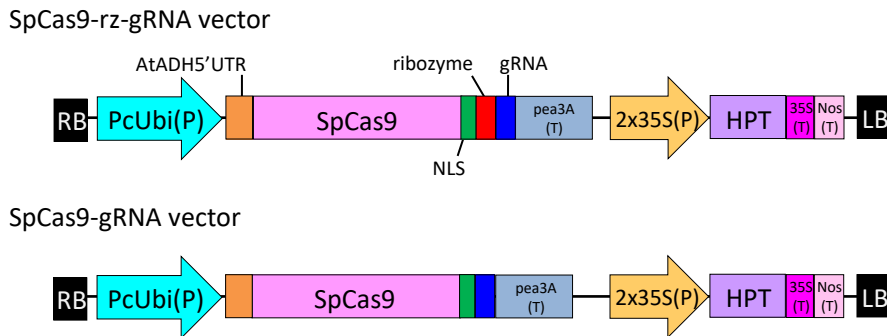

(B)

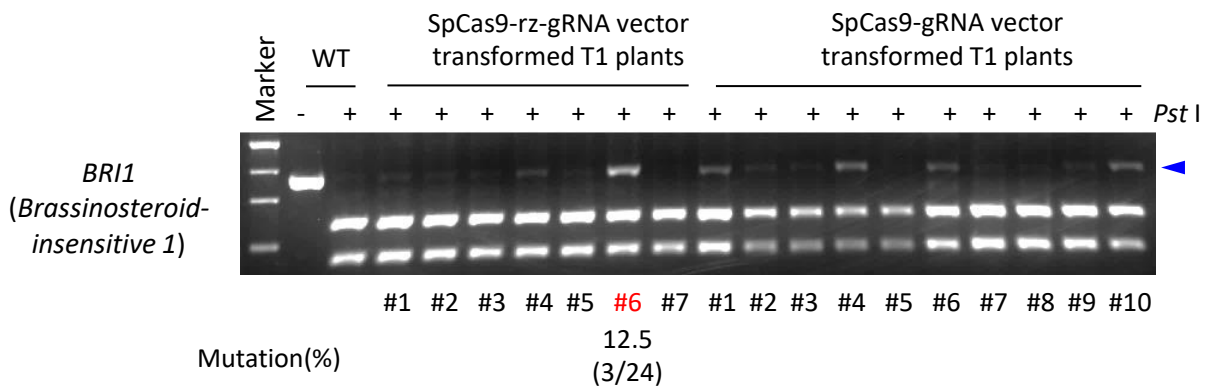

(C)

SpCas9-rz-gRNA transformed plant : line #6

TTCTCAATTTGGGTCATAACGATATCTCTGGTTCGATTCCCT WT (x21)

TTCTCAATTTGGGTCATAACGATA-CTCTGGTTCGATTCCCT -1 (x2)

TTCTCAATTTGGGTCATAA-----TCTCTGGTTCGATTCCCT -5 (x1)

Figure. S2

**(A)** SpCas9/OsU6gRNA and SpCas9/2x35SgRNA

OsU6-pro::gRNA::polyT-ter

CGCTGTCGCTTGTGTTGNNNNNNNNNNNNNNNNNNNNNNGTTTTAGAGCTAGAAATAGCAAGTTAAAATAAGGCTAGTCCGTTATCAACTTGAAAAAGTGGCACCGAGTCGGTGC

2x35S-pro::gRNA::35S-ter

TTTCATTGGAGAGGNNNNNNNNNNNNNNNNNNNNNNGTTTTAGAGCTAGAAATAGCAAGTTAAAATAAGGCTAGTCCGTTATCAACTTGAAAAAGTGGCACCGAGTCGGTGC

**(B)** SpCas9-rz-gRNA and SpCas9-gRNA

SpCas9-hammerhead ribozyme::gRNA::pea3A-ter

GAATAGATCTTAGCCAGCTCGGCGGTGATTGAAAGCCATGGGATATC

SpCas9::gRNA::pea3A-ter

GAATAGATCTTAGCCAGCTCGGCGGTGATTGAAAGCCATGGGATATC

**(C)** SpCas9 or GFP/HPT-rz-gRNA

2x35S-pro::HPT::hammerhead ribozyme::gRNA::35S-ter

AGCACTCGTCCGAGGGCAAAGAAATAGAAGGCCCTCGNNNNNNCTGATGAGTCCGTGAGGACGAAACGAGTAA

**Figure. S3**

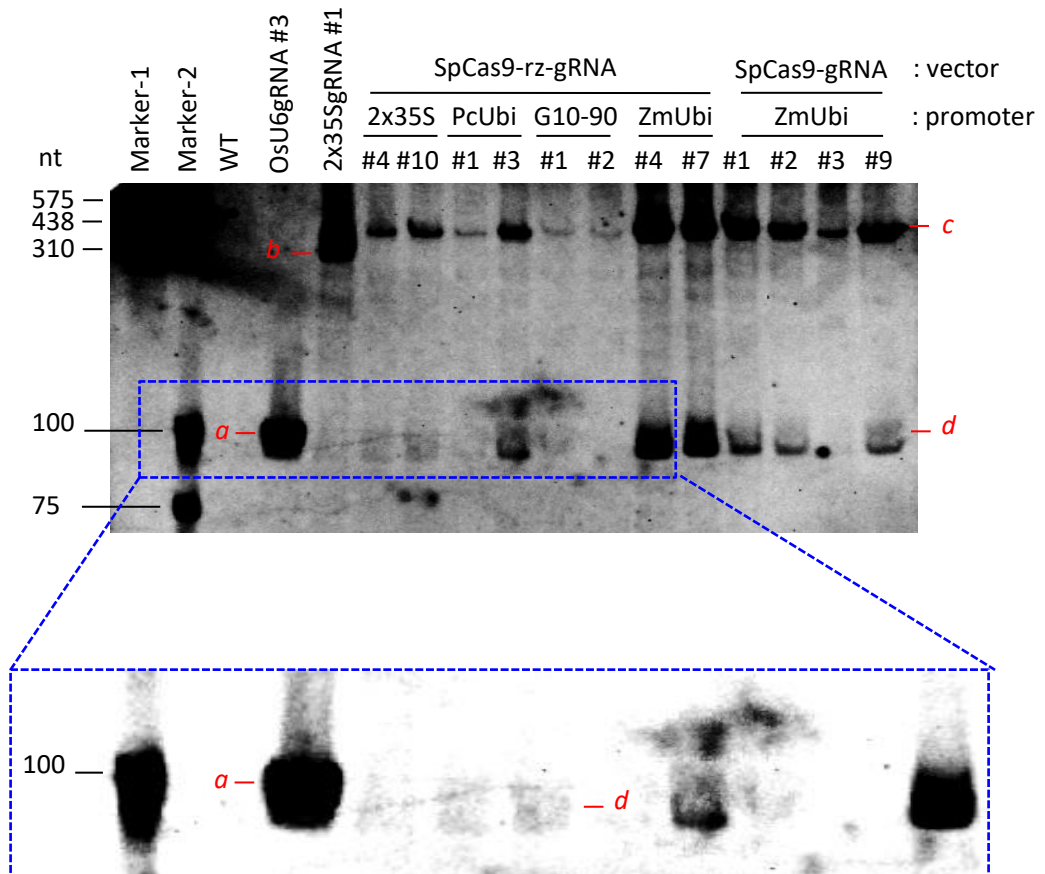

**Figure. S4**



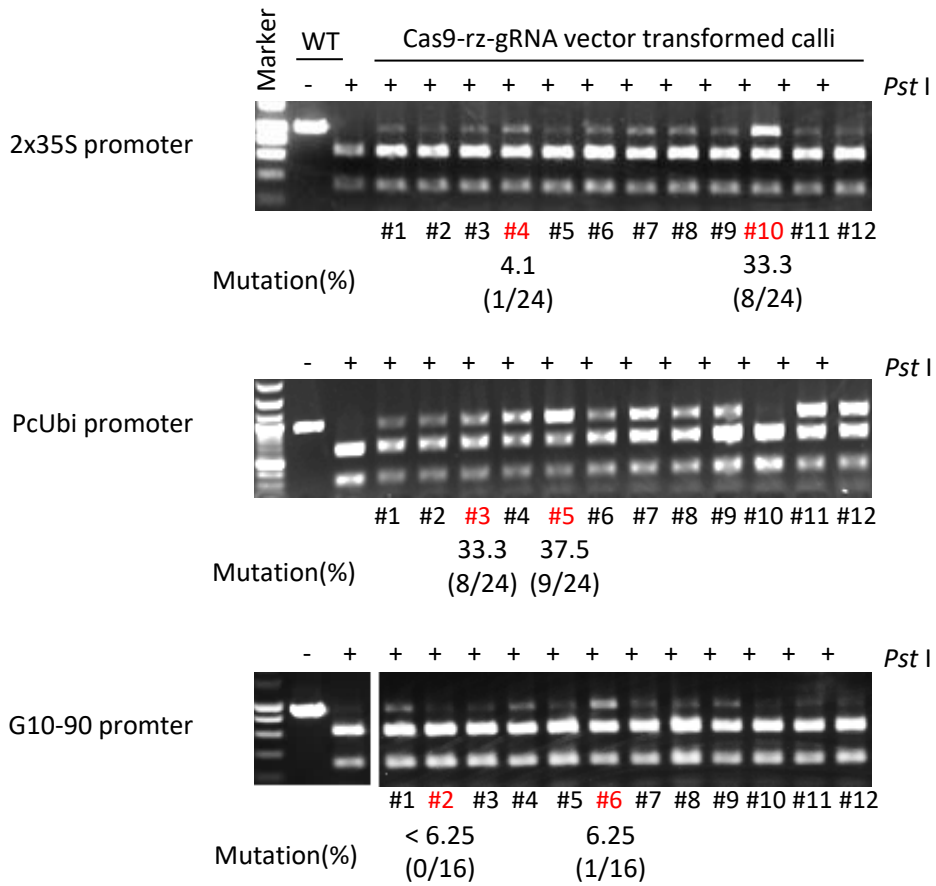

**Figure. S5**

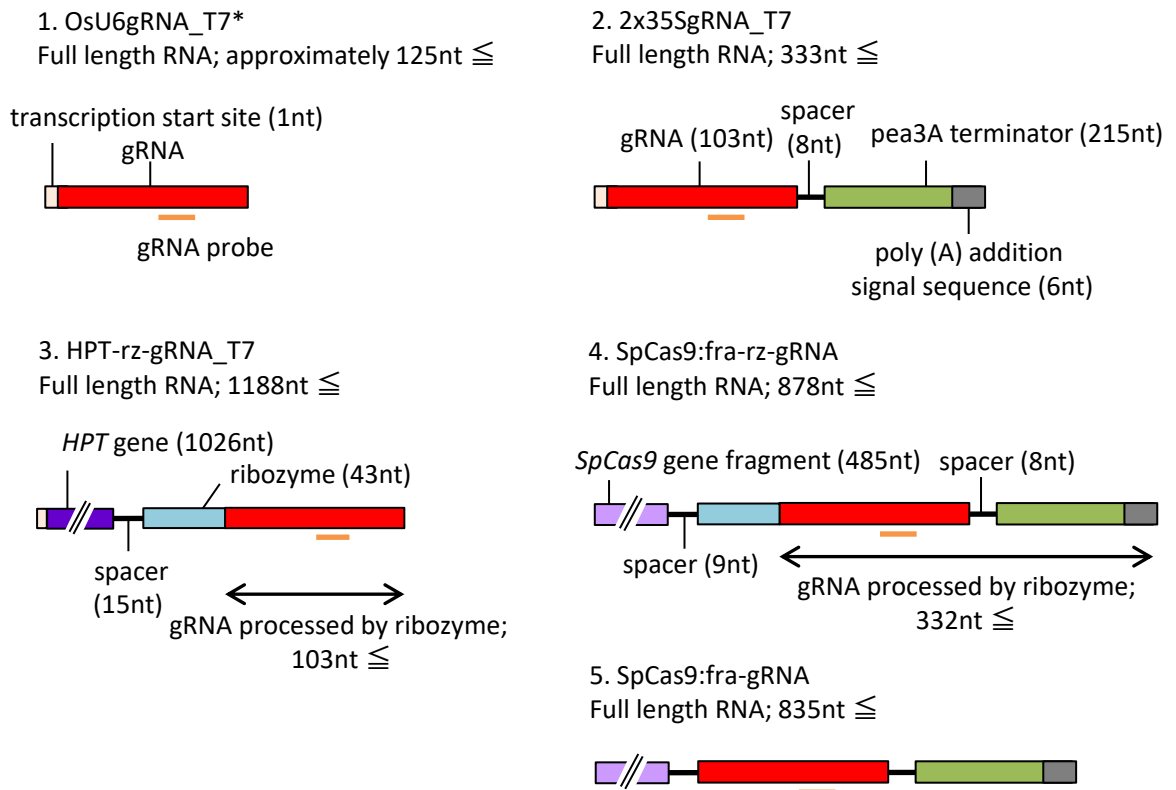

**Figure. S6**

(A)

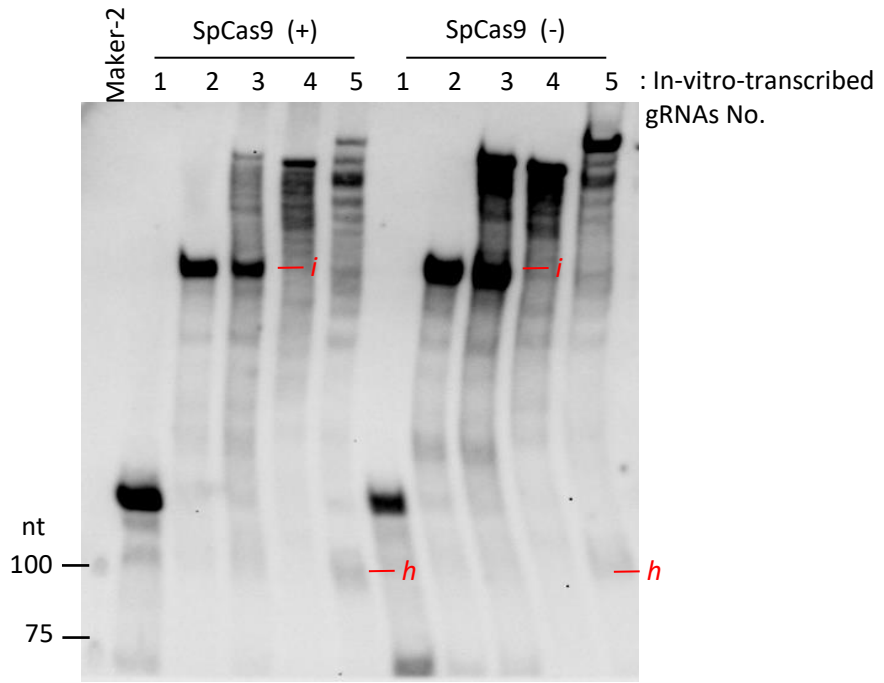

(B)

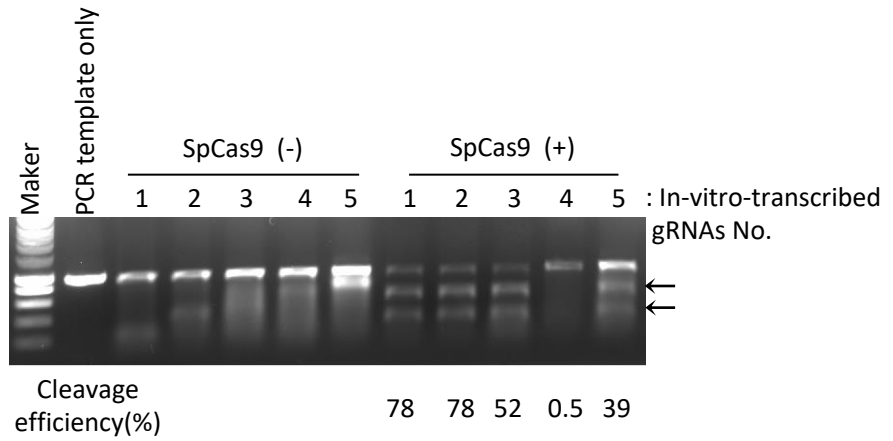

**Figure. S7**

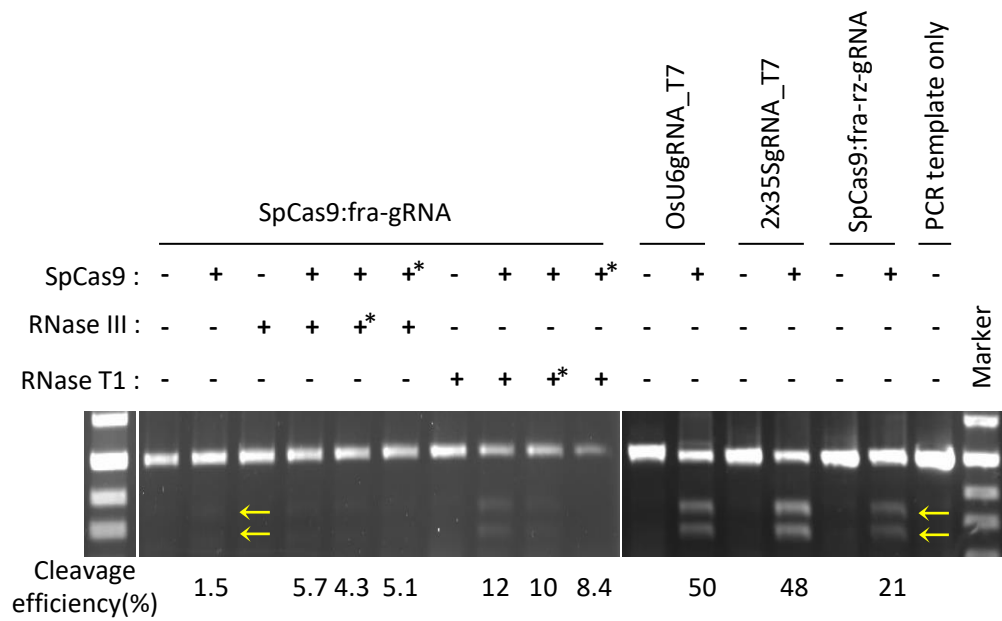

**Figure. S8**

(A)

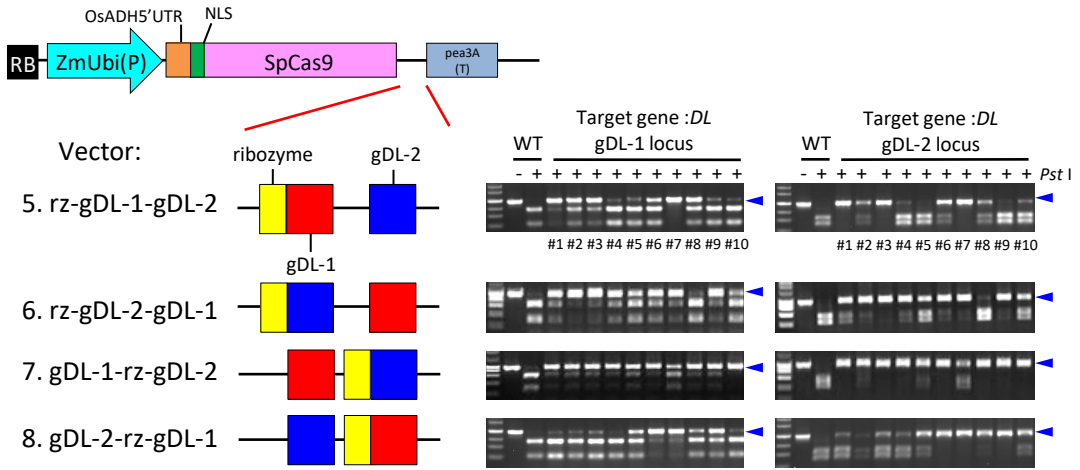

(B)

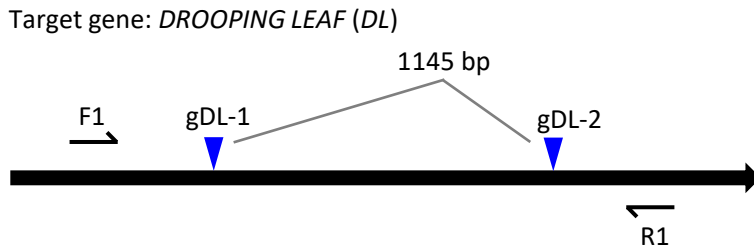

(C)

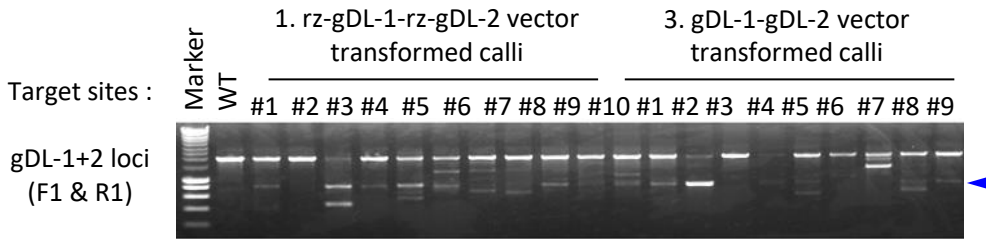

(D)

3. gDL-1-gDL-2 vector transformed callus : line #2

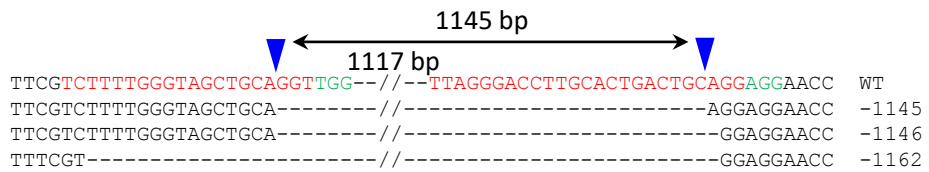

Figure. S9

**Table. S1**

**Mutation variations of transgenic plants regenerated from SpCas9-gRNAs vector transformed calli.**

|                    |    | 1. rz-gDL-1-rz-gDL-2 vector transformed regenerated plants |    |    |    |    |    |    |    |    |    |    |    |    |    |    |    |    |    |    |    |    |    |    |    |    |    |
|--------------------|----|------------------------------------------------------------|----|----|----|----|----|----|----|----|----|----|----|----|----|----|----|----|----|----|----|----|----|----|----|----|----|
| callus No.         | #2 |                                                            |    |    |    |    | #4 |    |    |    |    |    |    |    |    |    | #6 |    |    |    |    | #8 |    |    |    |    |    |
| Regenerated plants | 1  | 2                                                          | 3  | 4  | 5  | 6  | 1  | 2  | 3  | 4  | 5  | 6  | 7  | 8  | 9  | 10 | 1  | 2  | 3  | 4  | 5  | 1  | 2  | 3  | 4  | 5  | 6  |
| gDL-1 locus        | M  | B                                                          | B  | B  | B  | M  | B  | M  | M  | M  | M  | WT | B  | WT | WT | WT | M  | M  | B  | M  | M  | M  | WT | WT | WT | WT | M  |
| gDL-2 locus        | B  | B                                                          | B  | B  | B  | B  | B  | B  | B  | B  | B  | B  | B  | B  | B  | B  | B  | B  | B  | B  | B  | B  | M  | M  | M  | M  | M  |
| gDL-1+2 loci       | x  | x                                                          | x  | x  | ○  | x  | x  | x  | x  | x  | x  | x  | x  | x  | x  | x  | x  | x  | x  | x  | x  | x  | x  | x  | ○  | x  | x  |
| phenotype          | Dr | Dr                                                         | Dr | Dr | Dr | Dr | Dr | Dr | Dr | Dr | Dr | Dr | Dr | Dr | Dr | Dr | Dr | Dr | Dr | Dr | Dr | Dr | WT | WT | Dr | WT | Dr |

|                    |    | 2. rz-gDL-2-z-rgDL-1 vector transformed regenerated plants |    |    |    |    |    |    |    |    |    |    |    |    |    |    |    |    |    |    |
|--------------------|----|------------------------------------------------------------|----|----|----|----|----|----|----|----|----|----|----|----|----|----|----|----|----|----|
| callus No.         | #1 |                                                            |    |    |    |    | #2 |    |    |    |    | #4 |    |    |    |    |    |    |    |    |
| Regenerated plants | 1  | 2                                                          | 3  | 4  | 5  | 6  | 1  | 2  | 3  | 4  | 5  | 1  | 2  | 3  | 4  | 5  | 6  | 7  | 8  | 9  |
| gDL-1 locus        | B  | B                                                          | B  | B  | M  | M  | B  | M  | WT | M  | B  | WT | B  | B  | B  | B  | B  | B  | B  | B  |
| gDL-2 locus        | B  | B                                                          | B  | B  | B  | B  | B  | M  | B  | M  | B  | B  | B  | B  | B  | B  | B  | B  | B  | B  |
| gDL-1+2 loci       | x  | x                                                          | x  | x  | x  | x  | x  | ○  | x  | x  | x  | x  | x  | x  | x  | x  | x  | x  | x  | x  |
| phenotype          | Dr | Dr                                                         | Dr | Dr | Dr | Dr | Dr | Dr | Dr | Dr | Dr | Dr | Dr | Dr | Dr | Dr | Dr | Dr | Dr | Dr |

|                    |    | 3. gDL-1-gDL-2 vector transformed regenerated plants |    |    |    |    |    |    |    |    |    |    |    |    |    |    |    |    |    |    |    |
|--------------------|----|------------------------------------------------------|----|----|----|----|----|----|----|----|----|----|----|----|----|----|----|----|----|----|----|
| callus No.         | #1 |                                                      |    |    |    |    |    |    | #2 |    |    |    |    |    |    | #5 |    |    |    |    |    |
| Regenerated plants | 1  | 2                                                    | 3  | 4  | 5  | 6  | 7  | 8  | 1  | 2  | 3  | 4  | 5  | 6  | 7  | 8  | 1  | 2  | 3  | 4  | 5  |
| gDL-1 locus        | WT | M                                                    | B  | M  | B  | B  | B  | B  | B  | B  | B  | B  | B  | B  | B  | B  | M  | WT | WT | M  | WT |
| gDL-2 locus        | M  | B                                                    | B  | B  | B  | B  | M  | B  | B  | B  | B  | B  | B  | B  | B  | B  | M  | M  | M  | M  | B  |
| gDL-1+2 loci       | x  | x                                                    | x  | x  | x  | x  | x  | x  | x  | x  | x  | x  | x  | x  | x  | x  | ○  | x  | x  | x  | x  |
| phenotype          | WT | Dr                                                   | Dr | Dr | Dr | Dr | Dr | Dr | Dr | Dr | Dr | Dr | Dr | Dr | Dr | Dr | Dr | Dr | WT | WT | Dr |

|                    |    | 4. gDL-2-gDL-1 vector transformed regenerated plants |    |    |    |    |    |    |    |    |    |    |    |    |    |    |    |    |    |    |    |    |    |    |    |    |    |
|--------------------|----|------------------------------------------------------|----|----|----|----|----|----|----|----|----|----|----|----|----|----|----|----|----|----|----|----|----|----|----|----|----|
| callus No.         | #1 |                                                      |    |    |    |    | #2 |    |    |    |    |    |    |    | #3 |    |    |    |    |    | #4 |    |    |    |    |    |    |
| Regenerated plants | 1  | 2                                                    | 3  | 4  | 5  | 6  | 1  | 2  | 3  | 4  | 5  | 6  | 7  | 8  | 1  | 2  | 3  | 4  | 5  | 6  | 7  | 8  | 1  | 2  | 3  | 4  | 5  |
| gDL-1 locus        | WT | WT                                                   | WT | WT | WT | WT | B  | B  | B  | B  | B  | B  | B  | B  | WT | M  | B  | B  | B  | WT | B  | WT | WT | WT | WT | M  | M  |
| gDL-2 locus        | WT | WT                                                   | WT | WT | WT | WT | B  | B  | B  | B  | B  | B  | B  | B  | B  | B  | B  | B  | B  | WT | B  | WT | B  | B  | B  | B  | B  |
| gDL-1+2 loci       | ◎  | ◎                                                    | ◎  | ◎  | ◎  | ◎  | x  | x  | x  | x  | x  | x  | x  | x  | x  | x  | x  | x  | x  | ◎  | x  | ◎  | x  | x  | x  | x  | x  |
| phenotype          | Dr | Dr                                                   | Dr | Dr | Dr | Dr | Dr | Dr | Dr | Dr | Dr | Dr | Dr | Dr | Dr | Dr | Dr | Dr | Dr | Dr | Dr | Dr | Dr | Dr | Dr | Dr | Dr |

B, bi-allelic mutation  
 M, mono-allelic mutation  
 ○, deletion between gDL-1+2 loci on mono-allelic  
 ◎, deletion between gDL-1+2 loci on bi-allelic  
 Dr, drooping leaves phenotype  
 WT, wild type

**Table S2. List of primers used in this study.**

| Usage                                                        | Primer name           | Sequence (5'→3')                                                      |
|--------------------------------------------------------------|-----------------------|-----------------------------------------------------------------------|
| gRNA-oligo for rice                                          | rz-gDL-1-F            | TATCAAAGACTGATGAGTCCGTGAGGACGAAACGAGTAAGCTCGTCTCTTTGGGTAGCTGCAGGT     |
|                                                              | rz-gDL-1-R            | AAACACCTGCAGCTACCCAAAAGAGACGAGCTTACTCGTTTCGTCTCACGGACTCATCAGTCTTTT    |
|                                                              | rz-gDL-2-F            | TATCAAGGTCTGATGAGTCCGTGAGGACGAAACGAGTAAGCTCGTCGACCTTGCACTGACTGCAGG    |
|                                                              | rz-gDL-2-R            | AAACCTGCAGTCAGTCAAGGTCGACGAGCTTACTCGTTTCGTCTCACGGACTCATCAGGACCTT      |
|                                                              | rz-gYSA-F             | TATCGCGCGCCTGATGAGTCCGTGAGGACGAAACGAGTAAGCTCGTCGCGCCACCTCGGCCGAAG     |
|                                                              | rz-gYSA-R             | AAACCTTCGGCCGAGGTGGCGCGACGAGCTTACTCGTTTCGTCTCACGGACTCATCAGGCGCGC      |
|                                                              | rz-gPDS-F             | TATCTGGACGCTGATGAGTCCGTGAGGACGAAACGAGTAAGCTCGTCCGTCACACCCATTCTCTGC    |
|                                                              | rz-gPDS-R             | AAACGCAGAGGAATGGGTTGGACGGACGAGCTTACTCGTTTCGTCTCACGGACTCATCAGCGTCCA    |
|                                                              | gDL-1-F               | TATCTCTTTGGGTAGCTGCAGGT                                               |
|                                                              | gDL-1-F for 2x35S     | GAGGTCTTTGGGTAGCTGCAGGT                                               |
|                                                              | gDL-1-R               | AAACACCTGCAGCTACCCAAAAGA                                              |
|                                                              | gDL-2-F               | TATCGACCTTGCACTGACTGCAGG                                              |
|                                                              | gDL-2-R               | AAACCTGCAGTCAGTCAAGGTC                                                |
|                                                              | gYSA-F                | TATCGCGCGCCACCTCGGCCGAAG                                              |
|                                                              | gYSA-R                | AAACCTTCGGCCGAGGTGGCGCGC                                              |
|                                                              | gPDS-F                | TATCCGTCCAACCCATTCTCTGC                                               |
|                                                              | gPDS-R                | AAACGCAGAGGAATGGGTTGGACG                                              |
|                                                              | gDMC1A-F for 2x35S    | GAGGTGGAGATGTGAAGAAGCTGC                                              |
|                                                              | gDMC1A-R              | AAACGCAGCTTCTCACATCTCCA                                               |
| gRNA-oligo for <i>Arabidopsis</i>                            | rz-gBRI1-F            | TATCACCCAAGTATGAGTCCGTGAGGACGAAACGAGTAAGCTCGTCTTGGGTGATAACGATATCTC    |
|                                                              | rz-gBRI1-R            | AAACGAGATATCGTTATGACCCAAGACGAGCTTACTCGTTTCGTCTCACGGACTCATCAGTTGGGT    |
|                                                              | gBRI1-F               | TATCTTGGGTGATAACGATATCTC                                              |
|                                                              | gBRI1-R               | AAACGAGATATCGTTATGACCCAA                                              |
| Primers for Guide-it sgRNA <i>In Vitro</i> Transcription Kit | In vitro_T7-gDL-1     | GCGGCCTCTAATACGACTCACTATAGGGTCTTTTGGGTAGCTGCAGGTGTTTTAGAGCTAGAAATAGCA |
|                                                              | In vitro_T7-gDL-2     | GCGGCCTCTAATACGACTCACTATAGGGGACCTTGCACTGACTGCAGGGTTTTAGAGCTAGAAATAGCA |
| Primers for <i>in Vitro</i> Transcription T7 Kit             | T7-gDL-1-F            | AATACGACTCACTATAGGTCTTTTGGGTAGCTGCAGGTGTTTTAGAGC                      |
|                                                              | T7-gDL-2-F            | AATACGACTCACTATAGGGACCTTGCACTGACTGCAGGGTTTTAGAGC                      |
|                                                              | T7-SpCas9-F           | AATACGACTCACTATAGGACGGGAGAAAGCGTATGCTGGCGTCGGCGG                      |
|                                                              | T7-HPT-F              | AATACGACTCACTATAGGATGAAAAAGCCTGAACTACCGCGACGTCT                       |
|                                                              | PolyT-gRNA-Scaffold-R | AAAAAAGCACCGACTCGGTGCCACTTTTT                                         |
|                                                              | pea3A-polyA-signal-R  | TTTATTAAGTCTTATCCATCCATTGCAATTTGATGTCCG                               |
| PCR                                                          | OsDL-1F               | CAGTGCATGTTCCATCTTCGTTCCATT                                           |
|                                                              | OsDL-1R               | ATGGGCAAGAGAGAAATCTTTGCAATCCA                                         |
|                                                              | OsDL-2F               | TGCAAAGATTTCTCTCTTGCCCATCTGTG                                         |
|                                                              | OsDL-2R               | TTTCTCACCTCATGAAGCGGTTGTAAGCAG                                        |
|                                                              | OsYSA-F               | CATGCGCTCTTCCCCACCTGTACTTTAC                                          |
|                                                              | OsYSA-R               | CCCTAGCACCCATCTCCGAGTACACTGATT                                        |
|                                                              | OsPDS-F               | TGCAAGGTACTAAGTAGGACATTA                                              |
|                                                              | OsPDS-R               | TTGTAACAGATCTGTAACAGTGA                                               |
|                                                              | AtBRI1-F              | GATGGGATGAAGAAGAGTG                                                   |
|                                                              | AtBRI1-R              | CTCATCTCTACCAACAAG                                                    |
